# Supplementary material for: Evolutionary trade-offs associated with loss of PmrB function in host-adapted Pseudomonas aeruginosa
Source: PubMed Central journal article supplement (PMC6035264; doi:10.1038/s41467-018-04996-x), 2018-07-06
Supplement: 41467_2018_4996_MOESM1_ESM.pdf [file 41467_2018_4996_MOESM1_ESM.pdf]

**Evolutionary trade-offs associated with loss of PmrB  
function in host-adapted *Pseudomonas aeruginosa***

**Bricio-Moreno *et al.***

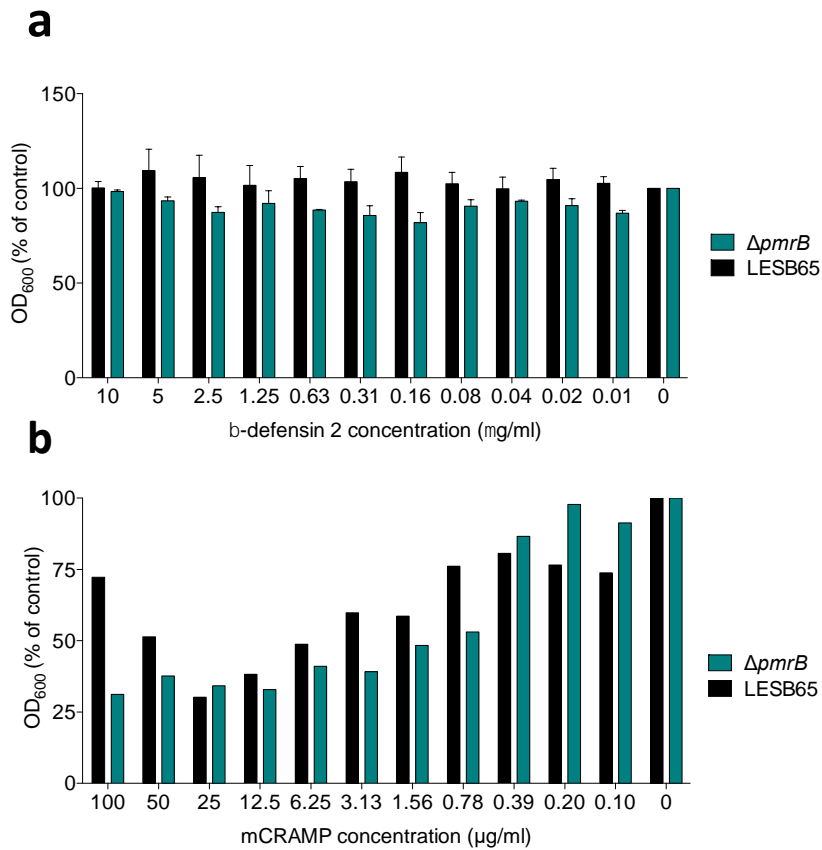

**Supplementary Figure 1. LESB65 and  $\Delta pmrB$  show comparable resistance to the host-derived antimicrobials  $\beta$ -defensin 2 and m-CRAMP.** Bacteria were cultured overnight in LB in the presence of **(a)**  $\beta$ -defensin 2 or **(b)** m-CRAMP. Data are from a single experiment and presented as OD<sub>600</sub> as a percent of growth in LB alone (mean  $\pm$ SD).

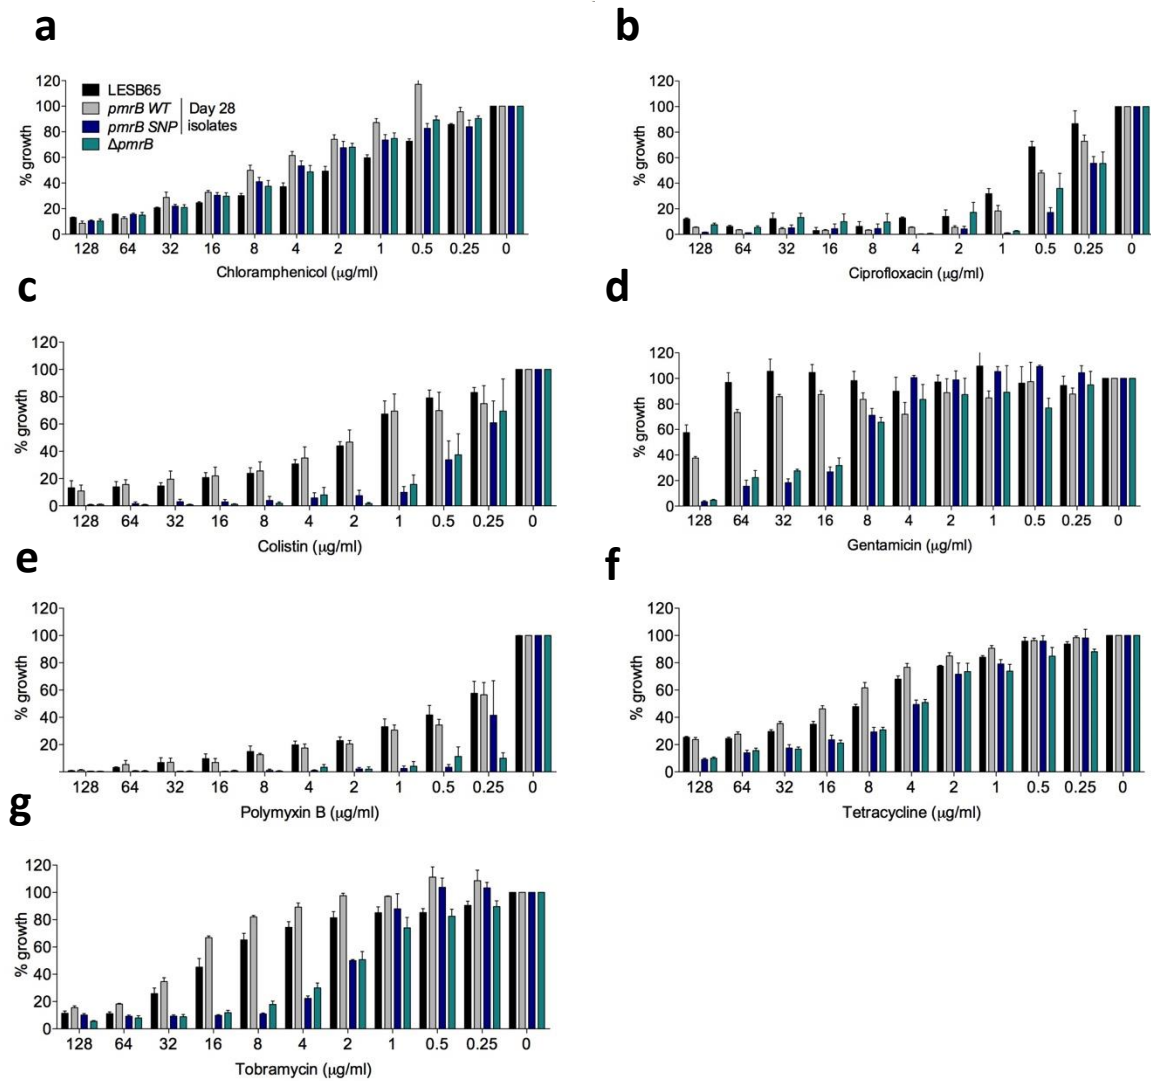

**Supplementary Figure 2. Minimum inhibitory concentration assays.** Percentage bacterial growth ( $OD_{600}$ ) in the presence of antibiotic relative to growth in LB for **(a)** chloramphenicol, **(b)** ciprofloxacin, **(c)** colistin, **(d)** gentamicin, **(e)** polymyxin B, **(f)** tetracycline, and **(g)** tobramycin. Assays were performed at least five times with a minimum of three technical replicates per assay. Presented data are a composite of all assay results (mean  $\pm$  SD). Significant differences vs LESB65 in two-way ANOVA: chloramphenicol ( $\Delta pmrB$   $p < 0.05$ ), ciprofloxacin (*pmrB* WT  $p < 0.001$ , *pmrB* SNP  $p < 0.0001$ ,  $\Delta pmrB$   $p < 0.0001$ ), colistin (*pmrB* SNP  $p < 0.0001$ ,  $\Delta pmrB$   $p < 0.0001$ ), gentamicin (*pmrB* SNP  $p < 0.0001$ ,  $\Delta pmrB$   $p < 0.0001$ ), polymyxin B (*pmrB* SNP  $p < 0.0001$ ,  $\Delta pmrB$   $p < 0.0001$ ), tobramycin (*pmrB* SNP  $p < 0.0001$ ,  $\Delta pmrB$   $p < 0.0001$ ), tetracycline (*pmrB* SNP  $p < 0.005$ ,  $\Delta pmrB$   $p < 0.0001$ ).

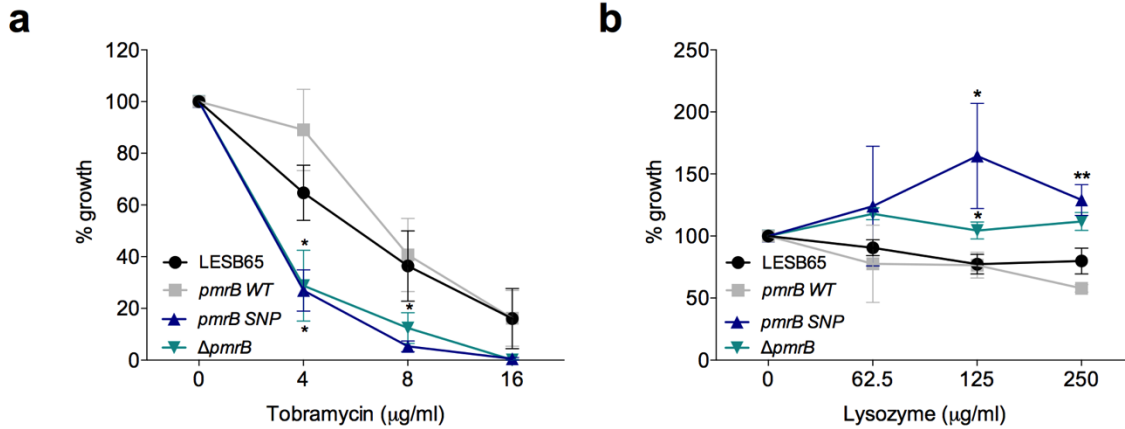

**Supplementary Figure 3. The effect of *pmrB* mutation on *P. aeruginosa* grown in biofilm. (A) Percentage growth in tobramycin-containing artificial sputum media (ASM) relative to no-antibiotic control. (B) Effect of engineered, inhibition-resistant lysozyme on growth of *P. aeruginosa* in ASM relative to no-lysozyme control. Data presented are mean  $\pm$  s.d. and are a composite of 3 independent experiments, each containing 3 technical replicates per isolate. \*'s represent significant differences in two-way ANOVA with Dunnett's multiple comparison test versus LESB65. \* =  $p < 0.05$ , \*\* =  $p < 0.01$ .**

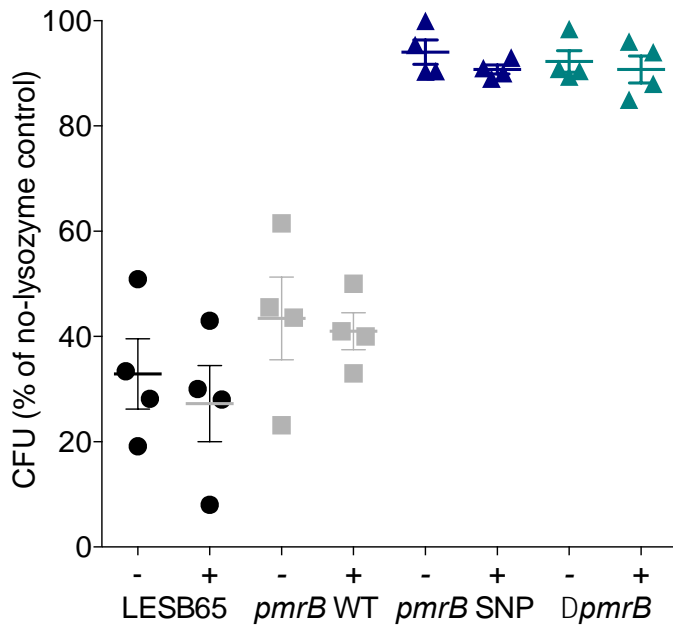

**Supplementary Figure 4. Charge-engineering does not influence the susceptibility of *pmrB* mutants to lysozyme in planktonic culture.** Isolates were grown in LB in the presence of 16 ug/ml native (-) or charge-engineered (+) lysozyme. Growth is presented as a percentage of the no-lysozyme control for each isolate and data points are individual biological replicates.

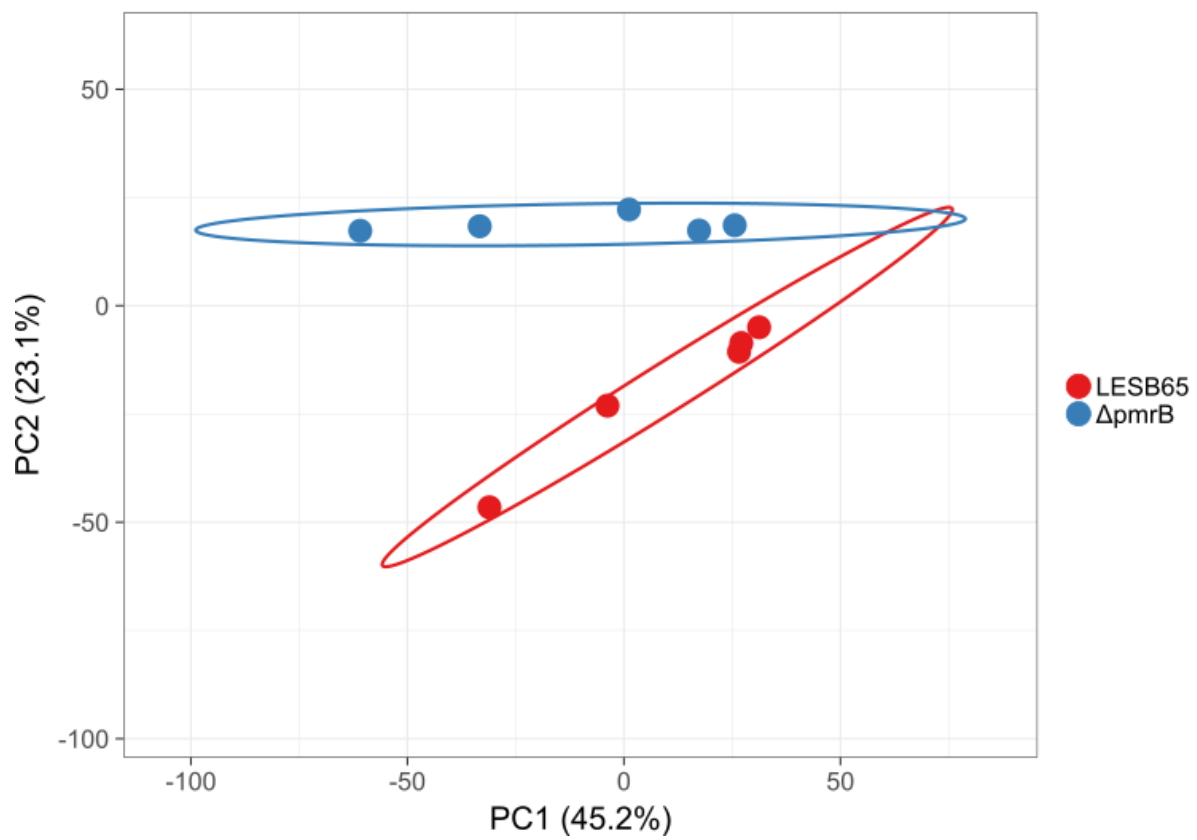

**Supplementary Figure 5. Principal component biplot of LESB65 and  $\Delta pmrB$  proteomics data showing all proteins detected.** Five biological replicates were performed for each isolate.

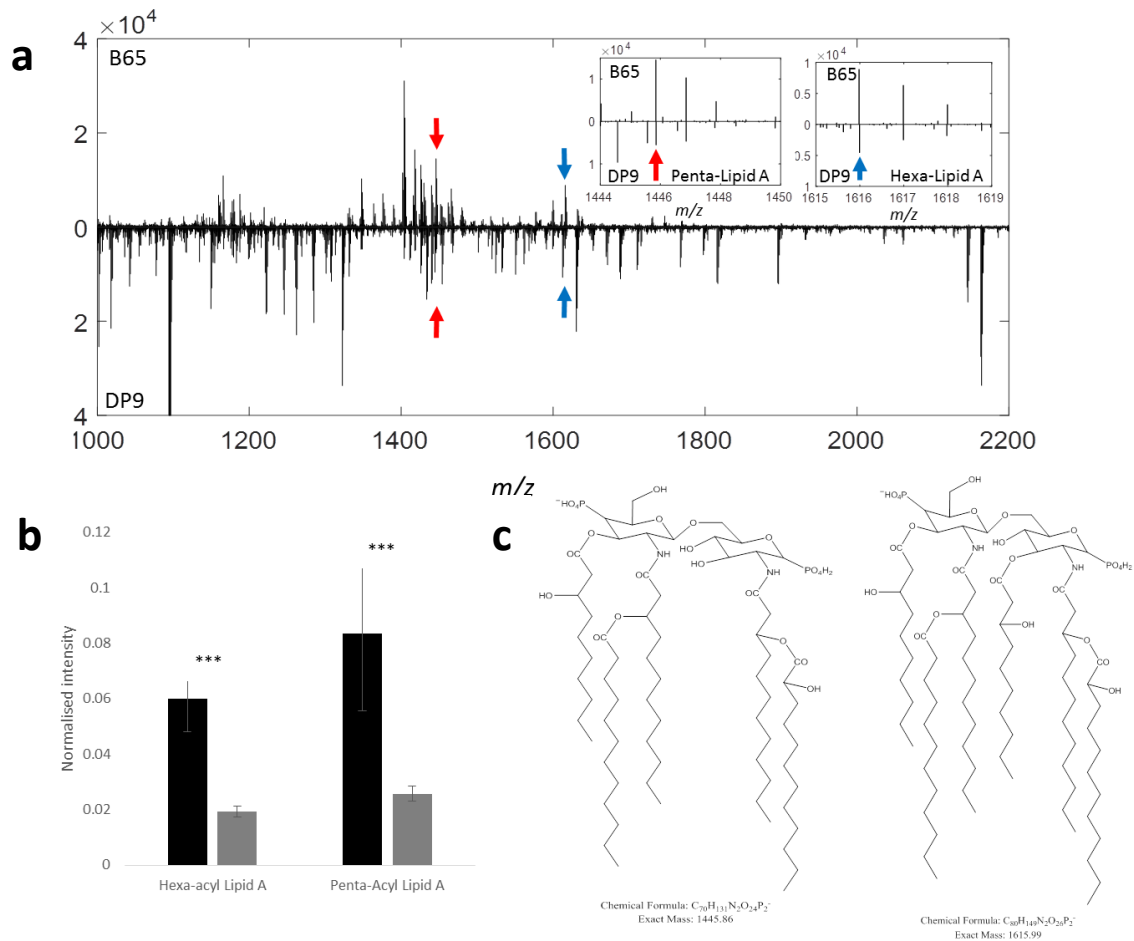

**Supplementary Figure 6. Lipid A modifications in LESB65 and  $\Delta pmrB$ .** (a). Negative ion mode MALDI-TOF MS spectra of intact heat-inactivated LESB65 and  $\Delta pmrB$  ( $m/z$  1000 – 2200). Hexa-acyl lipid A (blue arrows) was measured at 1615.9873 (theoretical mass = 1615.9879,  $\Delta$  ppm = - 0.37) and penta-acyl lipid A (red arrows) measured at 1445.8531 (theoretical mass = 1445.8572,  $\Delta$  ppm = - 2.8). (b) Normalised intensity of measured hexa-acyl lipid A and penta-acyl lipid A of LESB65 (black) and  $\Delta pmrB$  (grey). Four biological replicates (6 technical replicates) of each isolate, mean  $\pm$  SD, \*\*\* =  $p < 0.001$  in unpaired t-test with Welch's correction. (c) Chemical structures of penta-acyl lipid A (left) and hexa-acyl lipid A (right).

**a**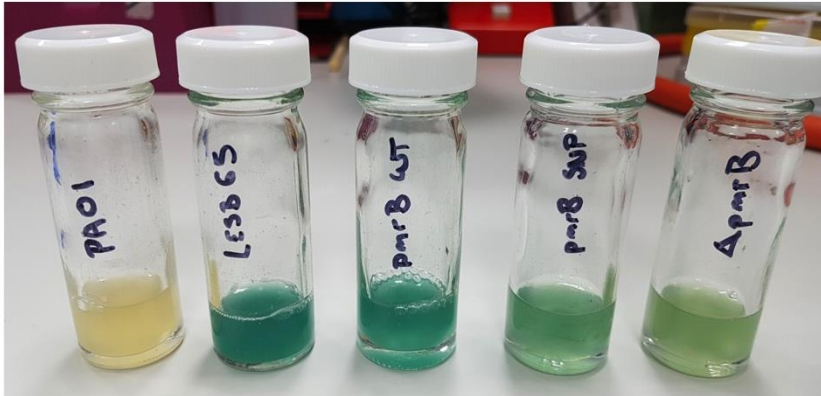**b**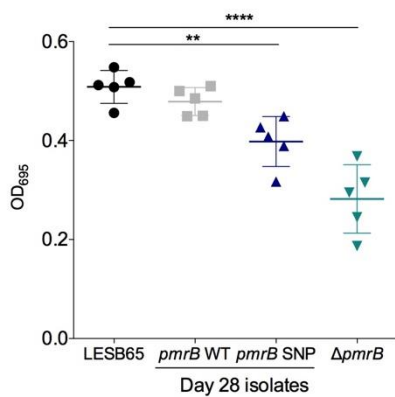**c**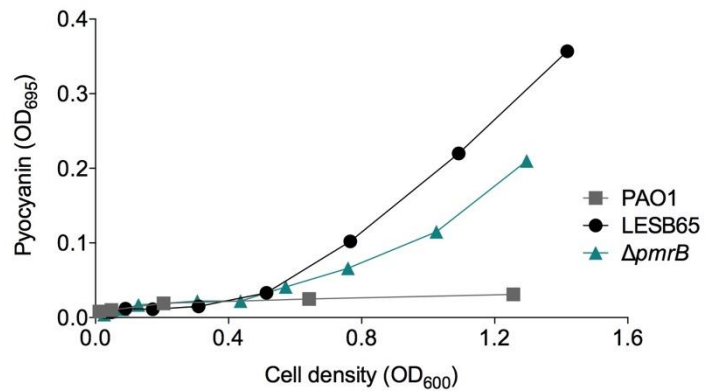

**Supplementary Figure 7. Pyocyanin production by LESB65 and  $\Delta$ *pmrB*.** (a) Overnight cultures of *P. aeruginosa* PAO1, LESB65, *pmrB* WT, *pmrB* SNP and  $\Delta$ *pmrB* grown from a single colony. (b) Quantification of pyocyanin production by OD<sub>695</sub> reading of cell-free culture supernatants from overnight growth. (c) Pyocyanin production (OD<sub>695</sub>) versus cell density (OD<sub>600</sub>) during 10 hours of growth following subculture of an overnight culture of a single colony. Each data point represents a single biological replicate. \*\* =  $p < 0.01$ , \*\*\*\* =  $p < 0.0001$  in one-way ANOVA with Dunnett's multiple comparison.



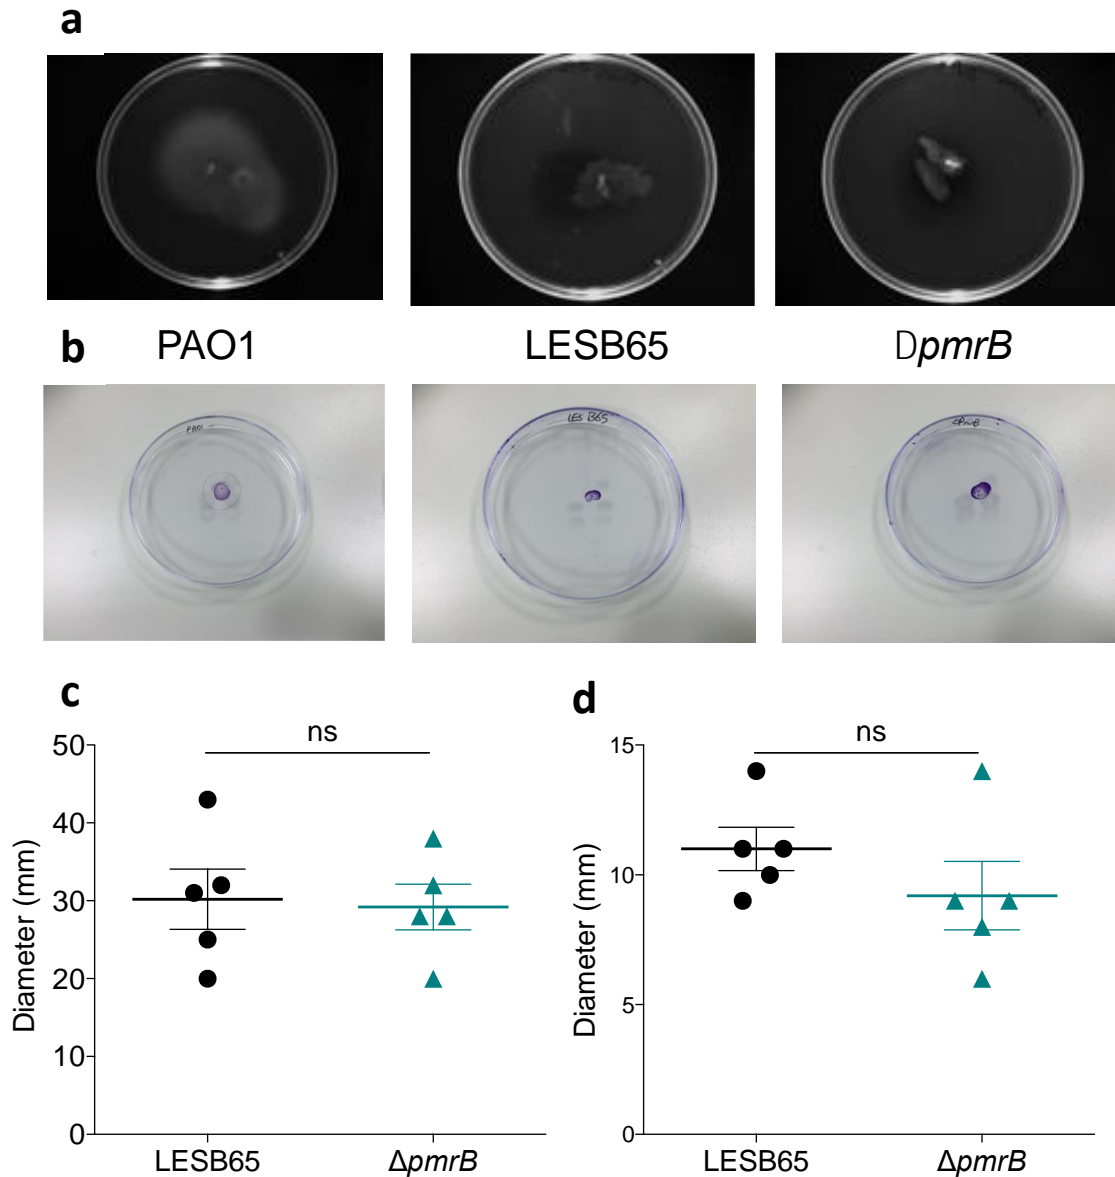

**Supplementary Figure 8. Swimming and twitching motility are comparable in  $\Delta pmrB$  and LESB65. (a) Swimming and (b) twitching motility of PAO1, LESB65 and  $\Delta pmrB$  on/in agar. (c) Swim and (d) twitch diameter of LESB65 and  $\Delta pmrB$  after 14 and 24 hour growth, respectively. Data points are individual biological replicates. ns = non-significant in unpaired t-test with Welch's correction.**

**Supplementary Table 1. Mutations identified by PacBio sequencing in *pmrB* SNP and *pmrB* WT.** REF = reference (LESB65), ALT = alteration.

| Position | Gene        | Annotation                                                      | REF | ALT | <i>pmrB</i> SNP | <i>pmrB</i> WT |
|----------|-------------|-----------------------------------------------------------------|-----|-----|-----------------|----------------|
| 1461970  | PALES_13561 | hypothetical protein                                            | C   | T   |                 | Thr>Thr        |
| 1462067  | PALES_13561 | hypothetical protein                                            | G   | A   |                 | Val>Met        |
| 1462105  | PALES_13561 | hypothetical protein                                            | T   | C   |                 | His>His        |
| 1462122  | PALES_13561 | hypothetical protein                                            | C   | T   |                 | Thr>Ile        |
| 2108526  | PALES_19541 | Oxidoreductase                                                  | C   | G   | Gly>Gly         |                |
| 2621560  | PALES_24391 | Nitric oxide reductase transcription regulator NorR2            | G   | T   | Thr>Asn         |                |
| 3326890  | PALES_30151 | TonB-dependent receptor                                         | C   | G   |                 | Leu>Leu        |
| 3326928  | PALES_30151 | TonB-dependent receptor                                         | C   | G   |                 | Thr>Ser        |
| 3496996  | PALES_31711 | Cardiolipin Synthase 2                                          | G   | C   |                 | Arg>Pro        |
| 3560685  | PALES_32271 | Putative Transmembrane Sensor                                   | G   | C   | Ala>Gly         |                |
| 3899297  | PALES_35161 | Putative Solute Binding Protein                                 | C   | G   |                 | Thr>Thr        |
| 4531964  | PALES_41021 | Glutathione-regulated Potassium-efflux system protein KefB      | T   | G   | Thr>Pro         |                |
| 5699445  | PALES_51621 | <i>pmrB</i> Two component regulator system signal sensor kinase | T   | A   | Leu>Gln         |                |
| 6247828  | PALES_56441 | Putative integral membrane transport protein                    | C   | G   |                 | Ala>Pro        |
| 6473649  | PALES_58431 | WbpY Glycosyltransferase                                        | A   | G   | Pro>Pro         | Pro>Pro        |
| 6601388  | PALES_59651 | Ribonuclease P protein component                                | C   | T   |                 | Ala>Thr        |

**Supplementary Table 2. Antimicrobial susceptibility of *P. aeruginosa* PAO1 with transposon insertions in *pmrB*.** Minimum inhibitory concentration ( $\mu\text{g/ml}$ ) required for 90% growth inhibition. Data are median values of n=3 biological replicates.

| <b>Antibiotic</b> | <b>Isolate</b>                   | <b>MIC90 (<math>\mu\text{g/ml}</math>)</b> |
|-------------------|----------------------------------|--------------------------------------------|
| Tobramycin        | PAO1                             | 2                                          |
|                   | pmrBtransposon 1 (phoAwp06q1A09) | 1                                          |
|                   | pmrBtransposon 2 (lacZwp08q1F09) | 1                                          |
| Colisitin         | PAO1                             | 8                                          |
|                   | pmrBtransposon 1 (phoAwp06q1A09) | 2                                          |
|                   | pmrBtransposon 2 (lacZwp08q1F09) | 2                                          |

**Supplementary Table 3. Cif and Ivy upregulation during planktonic growth in *pmrB* mutants.** Fold change in gene expression compared to LESB65 determined by qPCR performed on cultures grown in LB media and normalised using reference gene *proC*. Similar trends were observed with normalisation to *rpoD*. Data are from three biological replicates per isolate, each biological replicate containing two technical replicates.

| <b>Gene</b> | <b>LESB65</b> | <b><i>pmrB</i> WT</b> | <b><i>pmrB</i> SNP</b> | <b><math>\Delta</math><i>pmrB</i></b> |
|-------------|---------------|-----------------------|------------------------|---------------------------------------|
| <i>cif</i>  | 1             | 2.36                  | 4.90                   | 8.58                                  |
| <i>ivy</i>  | 1             | 0.28                  | 4.64                   | 1.57                                  |

**Supplementary Table 4. Antimicrobial susceptibility of patients isolates**

**a**

| <b>Patient A</b> |                |              |              |              |              |              |
|------------------|----------------|--------------|--------------|--------------|--------------|--------------|
|                  | <b>Isolate</b> | <b>MIC50</b> | <b>MIC90</b> |              | <b>MIC50</b> | <b>MIC90</b> |
| Colistin         | B38            | 2            | >128         |              | 16           | 64           |
|                  | 49194          | <b>0.5</b>   | <b>8</b>     | Tobramycin   | <b>1</b>     | <b>16</b>    |
|                  | B60            | 2            | 128          |              | 4            | 128          |
| Polymyxin B      | B38            | 0.5          | >128         |              | 32           | >128         |
|                  | 49194          | <b>0.25</b>  | <b>8</b>     | Tetracycline | <b>6</b>     | <b>64</b>    |
|                  | B60            | 0.5          | >128         |              | 16           | >128         |

**b**

| <b>Patient B</b> |                |              |              |              |              |              |
|------------------|----------------|--------------|--------------|--------------|--------------|--------------|
|                  | <b>Isolate</b> | <b>MIC50</b> | <b>MIC90</b> |              | <b>MIC50</b> | <b>MIC90</b> |
| Colistin         | B49            | 2            | >128         |              | 16           | >128         |
|                  | B40            | <b>1</b>     | <b>128</b>   |              | 16           | >128         |
|                  | B41            | 16           | >128         |              | 4            | 128          |
|                  | B109           | 8            | >128         | Tobramycin   | 4            | >128         |
|                  | B64            | 2            | >128         |              | 16           | >128         |
|                  | 49137          | <b>1</b>     | <b>128</b>   |              | <b>2</b>     | <b>64</b>    |
|                  | B65            | 2            | >128         |              | 32           | >128         |
| Polymyxin B      | B49            | 2            | 128          |              | 8            | >128         |
|                  | B40            | 1            | 64           |              | 8            | >128         |
|                  | B41            | 1            | 64           | Tetracycline | 8            | >128         |
|                  | B109           | <b>0.5</b>   | 32           |              | <b>4</b>     | <b>64</b>    |

|       |            |           |    |           |
|-------|------------|-----------|----|-----------|
| B64   | <b>0.5</b> | 64        | 8  | 128       |
| 49137 | <b>0.5</b> | <b>16</b> | 8  | <b>64</b> |
| B65   | 1          | 64        | 16 | >128      |

---

Minimum inhibitory concentration ( $\mu\text{g}$  per ml) required for **(a)** 50% or **(b)** 90% growth inhibition. Median MIC50 from a minimum of 5 replicates (range 5-7). The most sensitive isolates for each antibiotic are in bold and isolates with *pmrB* mutations are shaded grey.

**Supplementary Table 5. Cif and Ivy upregulation during planktonic growth in clinical isolates with *pmrB* mutations.** Fold change in gene expression compared to paired isolates from the same patient determined by qPCR performed on cultures grown in LB media and normalised using reference gene *proC*. Similar trends were observed with normalisation to *rpoD*. Data are from three biological replicates per isolate, each biological replicate containing two technical replicates.

|                  | <b>Isolate</b>              | <b><i>cif</i></b> | <b><i>ivy</i></b> |
|------------------|-----------------------------|-------------------|-------------------|
| <b>Patient A</b> | B38                         | 1                 | 1                 |
|                  | 49194 ( <i>pmrB</i> mutant) | 3.84              | 2.41              |
| <b>Patient B</b> | B40                         | 1                 | 1                 |
|                  | 49137 ( <i>pmrB</i> mutant) | 3.41              | 3.55              |
