# Supplementary material for: Evolutionary trade-offs associated with loss of PmrB function in host-adapted Pseudomonas aeruginosa
Source: PubMed Central journal article supplement (PMC6035264; doi:10.1038/s41467-018-04996-x), 2018-07-06
Supplement: 41467_2018_4996_MOESM2_ESM.pdf [file 41467_2018_4996_MOESM2_ESM.pdf]

## Description of Additional Supplementary Files

File Name: Supplementary Data 1

Description: Full proteomic dataset for LESB65 and  $\Delta pmrB$  during exponential growth in broth.

File Name: Supplementary Data 2

Description: Full proteomic dataset for LESB65,  $\Delta pmrB$  and *pmrB* SNP during exponential growth in broth.

File Name: Supplementary Data 3

Description: ChemDraw file for the hexa-acylated LPS structure in Supplementary Figure 6.

File Name: Supplementary Data 4

Description: ChemDraw file for the penta-acylated LPS structure in Supplementary Figure 6.
